# Supplementary material for: Comparison of Auditory Steady-State Responses With Conventional Audiometry in Older Adults
Source: Frontiers journal article supplement (doi:10.3389/fneur.2022.924096), 2022-07-04
Supplement: Data_Sheet_1.PDF [file Data_Sheet_1.PDF]

Supplementary material

Table S1: Pearson correlation coefficient values (r) between PTA and ASSR results at each frequency for left and right ears.

| <i>Frequency</i> | <b>Right Ear</b> |          | <b>Left Ear</b> |          | <b>Combined</b> |                    |
|------------------|------------------|----------|-----------------|----------|-----------------|--------------------|
|                  | r Value          | p Value  | r Value         | p Value  | r Value         | p Value            |
| <i>500 Hz</i>    | 0.418            | P 0.014  | 0.415           | P 0.018  | <b>0.418</b>    | <b>p &lt;0.001</b> |
| <i>1000 Hz</i>   | 0.596            | P <0.001 | 0.473           | P <0.001 | <b>0.533</b>    | <b>p &lt;0.001</b> |
| <i>2000 Hz</i>   | 0.749            | P <0.001 | 0.733           | P <0.001 | <b>0.737</b>    | <b>p &lt;0.001</b> |
| <i>4000 Hz</i>   | 0.836            | P <0.001 | 0.846           | P <0.001 | <b>0.837</b>    | <b>p &lt;0.001</b> |

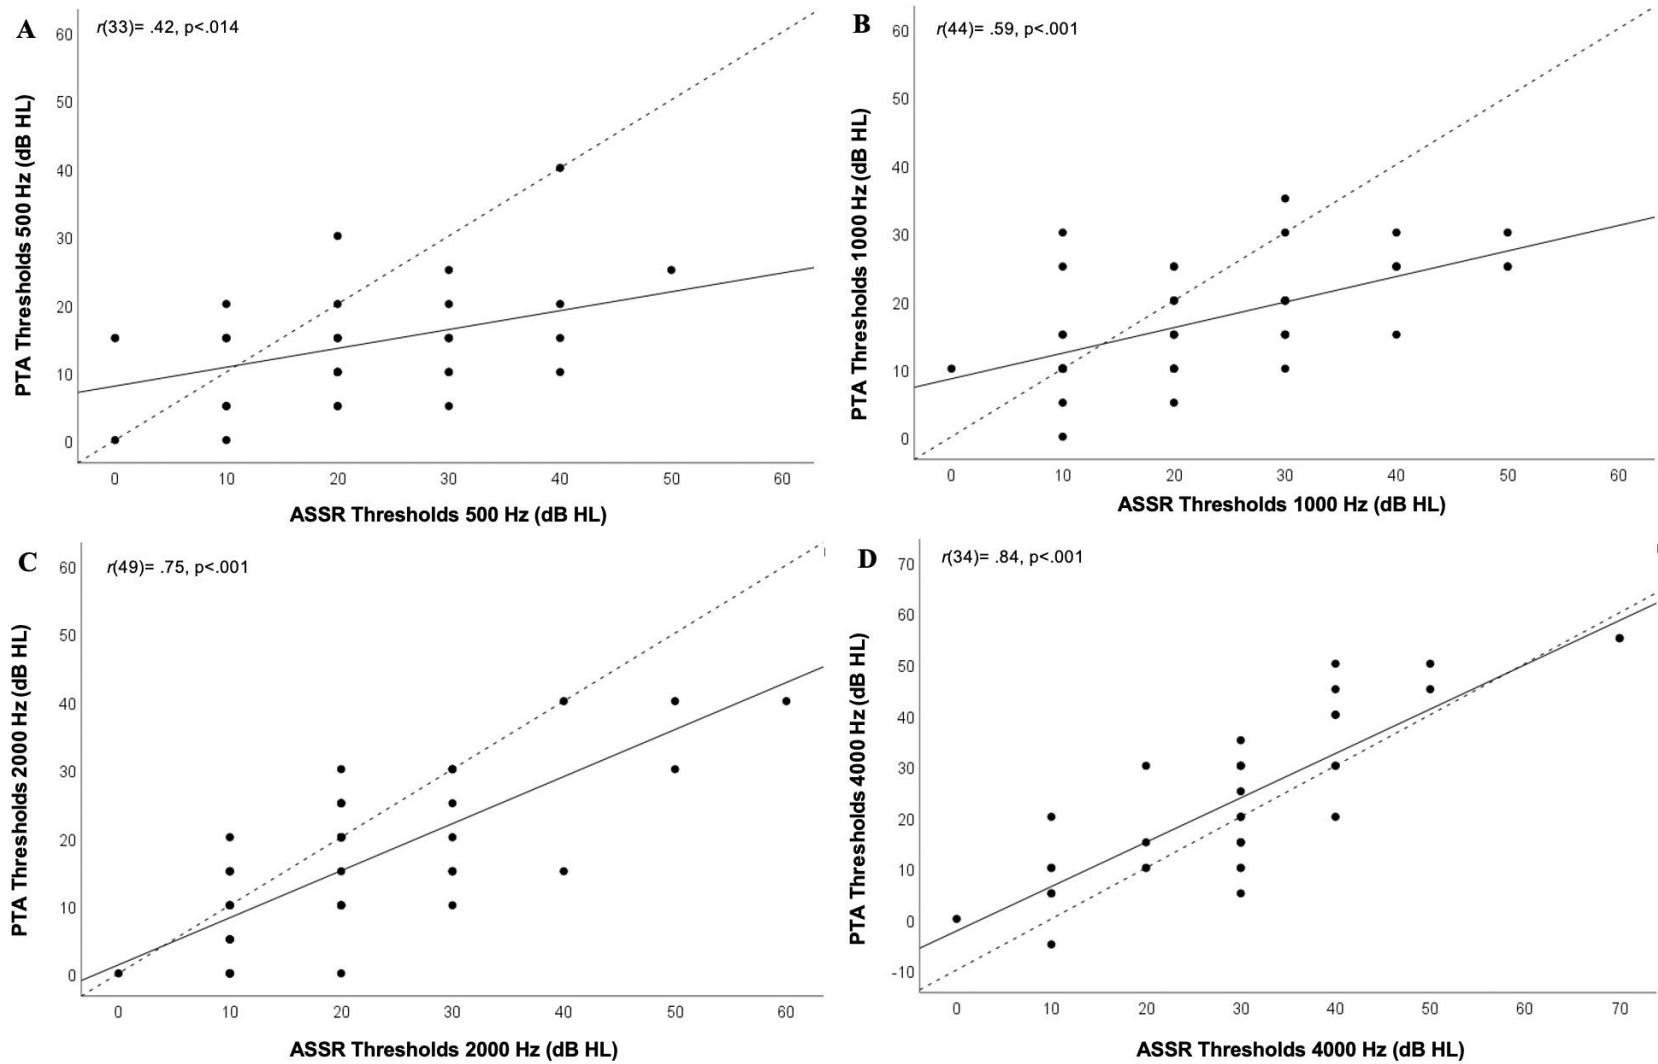

Figure S1: Correlation between hearing thresholds (Right ear only) obtained from auditory steady-state response (ASSR) (x-axis) and pure-tone audiometry (PTA) (y-axis) in dB HL according to carrier frequency. Correlation coefficients ( $r$ ) and p-value are presented on the top left corner of each panel for all tested frequencies. Black line indicates line of best fit, dotted line indicates 1:1 ratio line.

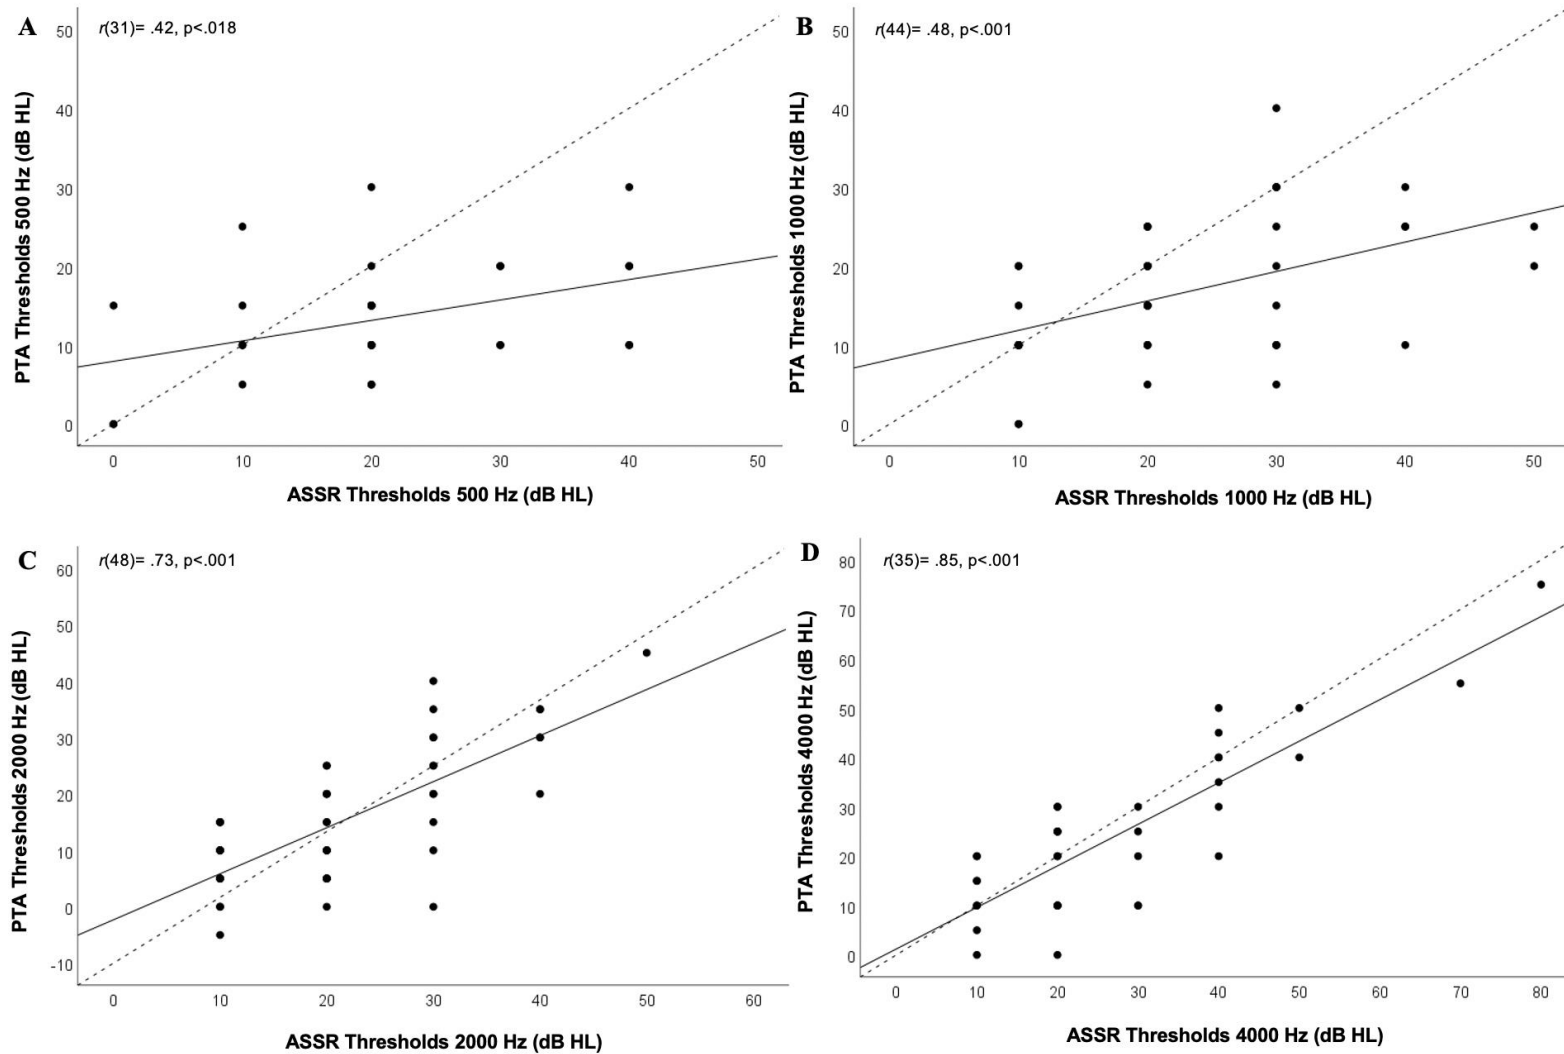

Figure S2: Correlation between hearing thresholds (Left ear only) obtained from auditory steady-state response (ASSR) (x-axis) and pure-tone audiometry (PTA) (y-axis) in dB HL according to carrier frequency. Correlation coefficients ( $r$ ) and  $p$ -value are presented on the top left corner of each panel for all tested frequencies. Black line indicates line of best fit, dotted line indicates 1:1 ratio line.
